# Supplementary material for: Diastereoselective synthesis of α-substituted-γ-butyrolactones of nucleosides via [1,5]-C,H insertion reactions of α-diazomalonates of nucleosides
Source: Royal Society of Chemistry journal article supplement (doi:10.1039/b000524j), 2000-01-01
Supplement: b000524j.doc [file b000524j.doc]

**Supplementary** **data**

**Diastereoselective synthesis of -substituted--butyrolactones of nucleosides via [1,5]-C,H insertion reactions of -diazomalonates of nucleosides**

Jinsoo Lim,*a* Dong-Joon Choo,*b* and Yong Hae Kim**a*

*a* *Department of Chemistry, Korea Advanced Institute of Science and Technology, Taejon, 305-701,* *and* *b* *Department* *of* *Chemistry, College of Liberal Arts and Sciences, Kyung Hee* *University,Seoul, 130-701,* *Korea*. *E-mail: kimyh@sorak.kaist.ac.kr*

**2b:** *δ*H (CDCl3, 200 MHz) 1.02 (9H, s, *Me3*CSi), 1.91 (3H, s, *CH3*), 2.28 (2H, m, H-2’), 3.64 (3H, s, CO2*CH3*), 3.93 (2H, d, H-5’), 4.11 (1H, m, H-3’), 4.22 (1H, m, H-4’), 5.87 (1H, m, H-1’), 7.33-7.58 (11H, m, *(C6H5)2*Si and H-6), and 8.9 (1H, br s, NH). *δ*C(CDCl3, 50 MHz) 14.4 (s), 15.8 (q), 20.5 (3 x q), 31.9 (t), 50.0 (q), 64.0 (t), 68.1 (d), 77.4 (d), 79.8 (d), 110.3 (s), 128.1-135.0 (*Ph2*Si), 135.8 (d), 152.0 (s), 160 (2 x s).

**6b:** *δ*H (CDCl3, 200 MHz) 1.01 (9H, s, *Me3*CSi), 1.79 (3H, s, *CH3*), 3.12 (1H, d, H-1”), 3.63 (1H, m, H-2’), 3.68 (3H, s, CO2*CH3*), 3.89 (2H, d, H-5’), 4.38 (1H, m, H-4’), 4.58 (1H, m, H-3’), 5.81 (1H, m, H-1’), and 7.33-7.68 (11H, m, *(C6H5)2*Si and H-6), 9.0 (1H, br s, NH). *δ*C(CDCl3, 50 MHz) 14.4 (s), 20.4 (3 x q), 22.6 (d), 46.0 (d), 50.1 (q), 64.8 (t), 72.0 (d), 76.0 (d), 81.7 (d), 109.7 (s), 128.0-134.8 (*Ph2*Si), 135.5 (s), 152.3 (s), 163.8 (s), 171.5 (2 x s).
